# Supplementary material for: Comparative accuracy of ChatGPT-4, Microsoft Copilot and Google Gemini in the Italian entrance test for healthcare sciences degrees: a cross-sectional study
Source: Springer Nature journal article supplement (doi:10.1186/s12909-024-05630-9), 2024-06-26
Supplement: 12909_2024_5630_MOESM2_ESM.pdf [file 12909_2024_5630_MOESM2_ESM.pdf]

## Additional File 2:

### Categorisation of answer

#### Examples of categorization of correct answers

**L** Un'auto di massa 1,5 t e velocità di 100 km/h in modulo urta un furgone di massa 4 t e velocità di 80 km/h in modulo, procedendo entrambi nella stessa direzione e verso. Se subito dopo l'urto i due mezzi procedono insieme, come un tutt'uno, determinare il modulo della velocità con cui il sistema si muove:

A) circa 85 km/h  
B) circa 70 km/h  
C) circa 42 km/h  
D) circa 31 km/h  
E) circa 10 km/h

 Per risolvere questo problema, possiamo utilizzare il principio della conservazione della quantità di moto. La quantità di moto totale prima dell'urto è uguale alla quantità di moto totale dopo l'urto.

La quantità di moto  $p$  di un oggetto è definita come:

$$p = m \times v$$

dove  $m$  è la massa e  $v$  è la velocità.

Prima dell'urto:

Quantità di moto dell'auto  $p_1 = \text{massa dell'auto } m_1 \times \text{velocità dell'auto } v_1$   
 $p_1 = 1,5t \times 100km/h = 150t \times km/h$

Quantità di moto del furgone  $p_2 = \text{massa del furgone } m_2 \times \text{velocità del furgone } v_2$   
 $p_2 = 4t \times 80km/h = 320t \times km/h$

Quantità di moto totale prima dell'urto  $P_{tot\_prima} = p_1 + p_2$   
 $P_{tot\_prima} = 150t \times km/h + 320t \times km/h = 470t \times km/h$

Dopo l'urto, le due macchine si muovono come un tutt'uno con una massa combinata  $m_{combinata}$  e una velocità  $v_{combinata}$ .

$$m_{combinata} = m_1 + m_2 = 1,5t + 4t = 5,5t$$

La quantità di moto totale dopo l'urto  $P_{tot\_dopo} = m_{combinata} \times v_{combinata}$

Poiché  $P_{tot\_prima} = P_{tot\_dopo}$  (principio della conservazione della quantità di moto),

$$470t \times km/h = 5,5t \times v_{combinata}$$

Dividendo entrambi i lati per 5,5 t, otteniamo:

$$v_{combinata} = \frac{470}{5,5} km/h = 85,45 km/h$$

Questo si arrotonda a:

$$v_{combinata} \approx 85 km/h$$

La risposta corretta è:

A) circa 85 km/h.



**Figure 1a:** Example of a correct answer labelled as "Logical reasoning", as the chatbot (ChatGPT-4) clearly demonstrate the logic presented in the response (question n. 51, CINECA test - 2023).

L I batteri di forma sferica sono genericamente detti: ^

A) spirochete

B) bacilli

C) vibrioni

D) spirilli

E) cocchi

Visualizza altre bozze v

La risposta corretta è (E), cocchi. I batteri di forma sferica sono chiamati cocchi. Le altre opzioni sono errate:

- (A) spirochete: i batteri di forma spiraliforme sono chiamati spirochete.
- (B) bacilli: i batteri di forma bastoncellare sono chiamati bacilli.
- (C) vibrioni: i batteri di forma a virgola sono chiamati vibrioni.
- (D) spirilli: i batteri di forma spiraliforme stretta sono chiamati spirilli.

Quindi, la risposta corretta è (E), cocchi.

Figure 1b: Example of a correct answer labelled as “Internal information”, as the chatbot (Bard) includes information internal to the question (question n. 29, CINECA test - 2019).

Quale delle seguenti affermazioni sull'ormone ossitocina NON è corretta?

A) È prodotta solo dagli individui di sesso femminile

B) È prodotta dall'ipotalamo

C) È rilasciata dalla neuroipofisi

D) Induce le contrazioni della muscolatura uterina durante il parto

E) Stimola l'eiezione del latte dalle ghiandole mammarie durante l'allattamento

✓ Ricerca in corso per: **ossitocina**

✓ Generazione delle risposte per l'utente in corso...

L'affermazione **A) È prodotta solo dagli individui di sesso femminile** non è corretta. L'ossitocina è un ormone prodotto dall'ipotalamo e secreto dalla neuroipofisi, presente in tutti i mammiferi, sia maschi che femmine <sup>1 2</sup>. Le altre affermazioni sono corrette: l'ossitocina è prodotta dall'ipotalamo (B), rilasciata dalla neuroipofisi (C), induce le contrazioni della muscolatura uterina durante il parto (D), e stimola l'eiezione del latte dalle ghiandole mammarie durante l'allattamento (E) <sup>1 2</sup>.

**Oxytocin**  
 $C_{43}H_{66}N_{12}O_{12}S_2$

Esplora

Altre informazioni v

1 it.wikipedia.org

2 my-personaltrainer.it

3 stateofmind.it

1 di 30 ●

Figure 1c: Example of a correct answer labelled as “External information”, as the chatbot (Microsoft Bing) use information external to the question to provide the answer, performing a web search and indicating the origin of the source from which the information is taken (question n. 30, CINECA test - 2023).

## Examples of categorization of incorrect answers

Quali tra i termini proposti completano correttamente la seguente proporzione verbale? inetto : X = Y : esiziale

- A) X = incapace; Y = meritato
- B) X = assente; Y = presente
- C) X = inane; Y = esistenziale
- D) X = investito; Y = essenziale
- E) X = adatto; Y = salutare

La risposta corretta è l'opzione A) X = incapace; Y = meritato. La proporzione verbale diventa: inetto : incapace = meritato : esiziale. Questo perché "inetto" e "incapace" sono sinonimi, così come "meritato" e "esiziale" possono essere considerati sinonimi in un certo contesto. Quindi, la proporzione verbale mantiene la sua coerenza semantica.

1 di 30 ●

**Figure 2a:** Example of an incorrect answer labelled as "Logical error", as the chatbot (Microsoft Bing) correctly identifies the relevant information but fail to convert it into an appropriate answer (question n. 10, CINECA test - 2016; correct answer: E).

Quale delle seguenti affermazioni riferite alla respirazione cellulare e alla fotosintesi che avvengono nelle cellule eucariotiche NON è corretta?

- A) Entrambe utilizzano NADH come trasportatore di elettroni e protoni
- B) Entrambe richiedono la presenza di specifici organuli cellulari
- C) La respirazione cellulare avviene in tutti gli organismi, mentre la fotosintesi avviene solo negli organismi autotrofi che sfruttano la luce solare come fonte di energia
- D) Entrambe prevedono reazioni cicliche
- E) La fotosintesi è un processo anabolico, la respirazione cellulare è un processo catabolico

✓ Ricerca in corso per: **Differenze tra respirazione cellulare e fotosintesi**

✓ Generazione delle risposte per l'utente in corso...

L'affermazione **D) Entrambe prevedono reazioni cicliche** non è corretta. Mentre la fotosintesi include il ciclo di Calvin, un insieme di reazioni chimiche che avvengono nel cloroplasto delle piante durante la fotosintesi<sup>1</sup>, la respirazione cellulare non è un processo ciclico. La respirazione cellulare è una serie di reazioni biochimiche, ma non formano un ciclo<sup>1</sup>. Le altre affermazioni (A, B, C, E) sono corrette<sup>1 2</sup>.

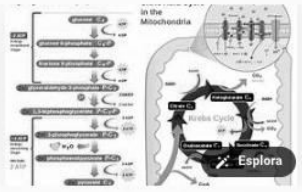

Altre informazioni ▼ 1 icceretolo.edu.it 2 it.strephonsays.com 3 ernesto.it

1 di 30 ●

Quali sono gli organuli cellulari coinvolti nella fotosintesi? Cosa succede durante il ciclo di Calvin?

**Figure 2b:** Example of an incorrect answer labelled as "Information error", as the chatbot (Microsoft Bing) fails to recognize a key piece of information, whether present in the question stem or through external information (question n. 20, CINECA test - 2023; correct answer: A).

L

In una gara di atletica al "via" l'atleta A parte con velocità 8 m/s mentre l'atleta B attende 2 secondi e poi parte con velocità 10 m/s. Quanti metri dovrà fare B per raggiungere A?

- A) 60
- B) 32
- C) 16
- D) 8
- E) 80

^

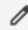

Visualizza altre bozze ▾

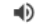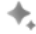

La risposta corretta è (B) 32.

In 2 secondi l'atleta A percorre una distanza di  $2 * 8 = 16$  metri.

La velocità di B è di 10 m/s, quindi per percorrere 16 metri impiegherà  $16 / 10 = 1,6$  secondi.

Quindi, l'atleta B dovrà percorrere una distanza totale di  $1,6 * 10 = 16$  metri per raggiungere l'atleta A.

Le altre risposte sono errate perché:

- (A) è la distanza che l'atleta A ha già percorso quando l'atleta B parte.
- (C) è la metà della distanza che l'atleta A ha già percorso quando l'atleta B parte.
- (D) è la distanza che l'atleta B deve percorrere in 2 secondi alla sua velocità.
- (E) è la somma della distanza che l'atleta A ha già percorso e della distanza che l'atleta B deve percorrere in 2 secondi alla sua velocità.

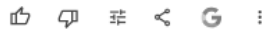

**Figure 2c:** Example of an incorrect answer labelled as "Statistical error", as the chatbot (Bard) commits an error that involves an arithmetic mistake (question n. 76, CINECA test - 2011; correct answer: E).
