# Supplementary material for: Comparative accuracy of ChatGPT-4, Microsoft Copilot and Google Gemini in the Italian entrance test for healthcare sciences degrees: a cross-sectional study
Source: Springer Nature journal article supplement (doi:10.1186/s12909-024-05630-9), 2024-06-26
Supplement: 12909_2024_5630_MOESM3_ESM.pdf [file 12909_2024_5630_MOESM3_ESM.pdf]

Additional File 3:

Example of question (Figure 1) and answer for each AI chatbot (Figure 2a, 2b, 2c).

51. Un'auto di massa 1,5 t e velocità di 100 km/h in modulo urta un furgone di massa 4 t e velocità di 80 km/h in modulo, procedendo entrambi nella stessa direzione e verso. Se subito dopo l'urto i due mezzi procedono insieme, come un tutt'uno, determinare il modulo della velocità con cui il sistema si muove:
- A) circa 85 km/h
  - B) circa 70 km/h
  - C) circa 42 km/h
  - D) circa 31 km/h
  - E) circa 10 km/h

Figure 1: Example of one of the 820 questions reported in the Word file. In this case, it concerns question number 51 of the CINECA Test of the year 2023/2024 (Physics and Mathematics Test). The correct answer (A) is highlighted in green.

- L** Un'auto di massa 1,5 t e velocità di 100 km/h in modulo urta un furgone di massa 4 t e velocità di 80 km/h in modulo, procedendo entrambi nella stessa direzione e verso. Se subito dopo l'urto i due mezzi procedono insieme, come un tutt'uno, determinare il modulo della velocità con cui il sistema si muove:
- A) circa 85 km/h
  - B) circa 70 km/h
  - C) circa 42 km/h
  - D) circa 31 km/h
  - E) circa 10 km/h

 Per risolvere questo problema, possiamo utilizzare il principio della conservazione della quantità di moto. La quantità di moto totale prima dell'urto è uguale alla quantità di moto totale dopo l'urto.

La quantità di moto  $p$  di un oggetto è definita come:

$$p = m \times v$$

dove  $m$  è la massa e  $v$  è la velocità.

Prima dell'urto:

Quantità di moto dell'auto  $p_1 =$  massa dell'auto  $m_1 \times$  velocità dell'auto  $v_1$

$$p_1 = 1,5t \times 100km/h = 150t \times km/h$$

Quantità di moto del furgone  $p_2 =$  massa del furgone  $m_2 \times$  velocità del furgone  $v_2$

$$p_2 = 4t \times 80km/h = 320t \times km/h$$

Quantità di moto totale prima dell'urto  $P_{tot\_prima} = p_1 + p_2$

$$P_{tot\_prima} = 150t \times km/h + 320t \times km/h = 470t \times km/h$$

Dopo l'urto, le due macchine si muovono come un tutt'uno con una massa combinata  $m_{combinata}$  e una velocità  $v_{combinata}$ .

$$m_{combinata} = m_1 + m_2 = 1,5t + 4t = 5,5t$$

La quantità di moto totale dopo l'urto  $P_{tot\_dopo} = m_{combinata} \times v_{combinata}$

Poiché  $P_{tot\_prima} = P_{tot\_dopo}$  (principio della conservazione della quantità di moto),

$$470t \times km/h = 5,5t \times v_{combinata}$$

Dividendo entrambi i lati per 5,5 t, otteniamo:

$$v_{combinata} = \frac{470}{5,5} km/h = 85,45 km/h$$

Questo si arrotonda a:

$$v_{combinata} \approx 85 km/h$$

La risposta corretta è:

A) circa 85 km/h.

 Rige

**Figure 2a:** The question was copied from the Word file and pasted into ChatGPT-4. The chatbot provides the correct answer (A).

Scegli uno stile di conversazione Anteprima

Altro Creativo    Altro Bilanciato    **Altro Preciso**

Un'auto di massa 1,5 t e velocità di 100 km/h in modulo urta un furgone di massa 4 t e velocità di 80 km/h in modulo, procedendo entrambi nella stessa direzione e verso. Se subito dopo l'urto i due mezzi procedono insieme, come un tutt'uno, determinare il modulo della velocità con cui il sistema si muove:

A) circa 85 km/h  
B) circa 70 km/h  
C) circa 42 km/h  
D) circa 31 km/h  
E) circa 10 km/h

Per risolvere questo problema, possiamo utilizzare il principio di conservazione della quantità di moto. La quantità di moto totale prima dell'urto è la somma delle quantità di moto dell'auto e del furgone. Dopo l'urto, poiché i due mezzi procedono insieme, la quantità di moto totale è data dalla massa totale moltiplicata per la velocità finale. Quindi, abbiamo:

Prima dell'urto: Quantità di moto dell'auto = massa dell'auto \* velocità dell'auto = 1,5 t \* 100 km/h = 150 tkm/h  
Quantità di moto del furgone = massa del furgone \* velocità del furgone = 4 t \* 80 km/h = 320 tkm/h  
Quantità di moto totale = 150 tkm/h + 320 tkm/h = 470 tkm/h

Dopo l'urto: Quantità di moto totale = massa totale \* velocità finale 470 tkm/h = (1,5 t + 4 t) \* velocità finale  
Risolvendo per la velocità finale otteniamo:

Velocità finale = 470 tkm/h / 5,5 t ≈ 85 km/h

Quindi, la risposta corretta è l'opzione A) circa 85 km/h.

Chiedimi qualsiasi cosa...

0/4000

**Figure 2b:** The question was copied from the Word file and pasted into Bing Chat (conversation style: Precise). The chatbot provides the correct answer (A).

- Un'auto di massa 1,5 t e velocità di 100 km/h in modulo urta un furgone di massa 4 t e velocità di 80 km/h in modulo, procedendo entrambi nella stessa direzione e verso. Se subito dopo l'urto i due mezzi procedono insieme, come un tutt'uno, determinare il modulo della velocità con cui il sistema si muove:
- A) circa 85 km/h
  - B) circa 70 km/h
  - C) circa 42 km/h
  - D) circa 31 km/h
  - E) circa 10 km/h

La risposta corretta è (C).

La quantità di moto totale del sistema è conservata, quindi:

$$m_1v_1 + m_2v_2 = (m_1 + m_2)v$$

Sostituendo i valori dati, otteniamo:

$$(1,5 \text{ t})(100 \text{ km/h}) + (4 \text{ t})(80 \text{ km/h}) = (1,5 \text{ t} + 4 \text{ t})v$$

$$15000 \text{ kg m/s} + 32000 \text{ kg m/s} = 55000 \text{ kg m/s} \cdot v$$

$$v = 42 \text{ km/h}$$

Quindi, la velocità del sistema subito dopo l'urto è di circa 42 km/h.

Le altre risposte sono errate perché non rispettano la conservazione della quantità di moto.

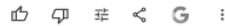

Visualizza altre bozze ▼

**Figure 2c:** The question was copied from the Word file and pasted into Google Bard. In this case the chatbot provide an incorrect answer (C).
